# Supplementary material for: The Role of Occupational Therapy in Managing Food Selectivity of Children with Autism Spectrum Disorder: A Scoping Review
Source: MDPI journal article supplement (doi:10.3390/children8111024), 2021-11-07
Supplement: s1 [file s1]

**Table S1.** Databases and search strategies.

| Database/journal                                       | Search strategies                                                                                                                                                                                                                                                                              | Results |
|--------------------------------------------------------|------------------------------------------------------------------------------------------------------------------------------------------------------------------------------------------------------------------------------------------------------------------------------------------------|---------|
| <b>Embase</b>                                          |                                                                                                                                                                                                                                                                                                |         |
| 1                                                      | ('food selectivity'/exp OR 'food selectivity' OR picky) AND ('autism'/exp OR autism OR autistic OR 'asd'/exp OR asd OR asperger OR rett OR disintegrative OR pervasive)                                                                                                                        | 184     |
| 2                                                      | ('food selectivity'/exp OR 'food selectivity' OR picky) AND ('autism'/exp OR autism OR autistic OR 'asd'/exp OR asd OR asperger OR rett OR disintegrative OR pervasive) AND 'occupational therapy'                                                                                             | 13      |
| 3                                                      | #1 OR #2                                                                                                                                                                                                                                                                                       | 184     |
| <b>PubMed</b>                                          |                                                                                                                                                                                                                                                                                                |         |
| 1                                                      | ("food selectivity" OR picky) AND (autism OR autistic OR ASD OR asperger OR rett OR disintegrative OR pervasive)                                                                                                                                                                               | 125     |
| 2                                                      | ("food selectivity" OR picky) AND (autism OR autistic OR ASD OR asperger OR rett OR disintegrative OR pervasive) AND "occupational therapy"                                                                                                                                                    | 7       |
| 3                                                      | #1 OR #2                                                                                                                                                                                                                                                                                       | 125     |
| <b>Scopus</b>                                          |                                                                                                                                                                                                                                                                                                |         |
| 1                                                      | ("food selectivity" OR picky) AND (autism OR autistic OR asd OR asperger OR rett OR disintegrative OR pervasive)                                                                                                                                                                               | 1,098   |
| 2                                                      | TITLE-ABS-KEY (("food selectivity" OR picky) AND (autism OR autistic OR asd OR asperger OR rett OR disintegrative OR pervasive))                                                                                                                                                               | 192     |
| 3                                                      | TITLE-ABS-KEY ("food selectivity" OR picky) AND (autism OR autistic OR asd OR asperger OR rett OR disintegrative OR pervasive) AND "occupational therapy"                                                                                                                                      | 2       |
| 4                                                      | TITLE-ABS-KEY (("food selectivity" OR picky) AND (autism OR autistic OR asd OR asperger OR rett OR disintegrative OR pervasive)) AND TITLE-ABS-KEY ("food selectivity" OR picky) AND (autism OR autistic OR asd OR asperger OR rett OR disintegrative OR pervasive) AND "occupational therapy" | 192     |
| <b>Web of science</b>                                  |                                                                                                                                                                                                                                                                                                |         |
| 1                                                      | ((("food selectivity" OR picky) AND (autism OR autistic OR ASD OR asperger OR rett OR disintegrative OR pervasive)))                                                                                                                                                                           | 304     |
| 2                                                      | ((("food selectivity" OR picky) AND (autism OR autistic OR ASD OR asperger OR rett OR disintegrative OR pervasive) AND "occupational therapy"))                                                                                                                                                | 9       |
| 3                                                      | #2 OR #1                                                                                                                                                                                                                                                                                       | 304     |
| <b>American Journal of Occupational Therapy</b>        |                                                                                                                                                                                                                                                                                                |         |
| 1                                                      | ("food selectivity" OR picky) AND (autism OR autistic OR ASD OR asperger OR rett OR disintegrative OR pervasive)                                                                                                                                                                               | 17      |
| 2                                                      | ("food selectivity" OR picky) AND (autism OR autistic OR ASD OR asperger OR rett OR disintegrative OR pervasive) AND "occupational therapy"                                                                                                                                                    | 6       |
| <b>Journal of Occupation Rehabilitation</b>            |                                                                                                                                                                                                                                                                                                |         |
| 1                                                      | ("food selectivity" OR picky) AND (autism OR autistic OR ASD OR asperger OR rett OR disintegrative OR pervasive)                                                                                                                                                                               | 605     |
| 2                                                      | ("food selectivity" OR picky) AND (autism OR autistic OR ASD OR asperger OR rett OR disintegrative OR pervasive) AND "occupational therapy"                                                                                                                                                    | 95      |
| <b>Physical &amp; Occupation Therapy in Pediatrics</b> |                                                                                                                                                                                                                                                                                                |         |

|                                                 |                                                                                                                                                                                                                                                                                   |   |
|-------------------------------------------------|-----------------------------------------------------------------------------------------------------------------------------------------------------------------------------------------------------------------------------------------------------------------------------------|---|
| 1                                               | [All: asd] OR [All: autism] OR [All: autistic] OR [All: asperger] OR [All: rett] OR [All: pervasive] OR [All: disintegrative] AND [in Journal: Physical & Occupational Therapy In Pediatrics]                                                                                     | 5 |
| 2                                               | [[All: "food selectivity"] OR [All: picky]] AND [[All: autism] OR [All: autistic] OR [All: asd] OR [All: asperger] OR [All: rett] OR [All: disintegrative] OR [All: pervasive]] AND [All: "occupational therapy"] AND [in Journal: Physical & Occupational Therapy In Pediatrics] | 4 |
| <b>Occupation, Participation &amp; Health</b>   |                                                                                                                                                                                                                                                                                   |   |
| 1                                               | [[All "food selectivity"] OR [All picky]] AND [[All autism] OR [All autistic] OR [All asd] OR [All asperger] OR [All rett] OR [All disintegrative] OR [All pervasive]]                                                                                                            | 3 |
| 2                                               | [[All "food selectivity"] OR [All picky]] AND [[All autism] OR [All autistic] OR [All asd] OR [All asperger] OR [All rett] OR [All disintegrative] OR [All pervasive]] AND [All "occupational therapy"]                                                                           | 3 |
| <b>Scandinavian Occupational Therapy</b>        |                                                                                                                                                                                                                                                                                   |   |
| 1                                               | [[All: autism] OR [All: autistic] OR [All: asd] OR [All: asperger] OR [All: rett] OR [All: disintegrative] OR [All: pervasive]] AND [All: feeding] AND [in Journal: Scandinavian Journal of Occupational Therapy]                                                                 | 0 |
| 2                                               | [[All: "food selectivity"] OR [All: picky]] AND [[All: autism] OR [All: autistic] OR [All: asd] OR [All: asperger] OR [All: rett] OR [All: disintegrative] OR [All: pervasive]] AND [All: "occupational therapy"] AND [in Journal: Scandinavian Journal of Occupational Therapy]  | 0 |
| <b>Australian Occupational Therapy Journal</b>  |                                                                                                                                                                                                                                                                                   |   |
| 1                                               | "("food selectivity" OR picky) AND (autism Oautistic OR ASD OR asperger OR rett OR disintegrative OR pervasive)" anywhere published in "Australian Occupational Therapy Journal"                                                                                                  | 2 |
| 2                                               | "("food selectivity" OR picky) AND (autism OR autistic OR ASD OR asperger OR rett OR disintegrative OR pervasive) AND "occupational therapy"" anywhere published in "Australian Occupational Therapy Journal"                                                                     | 2 |
| <b>Canadian Journal of Occupational Therapy</b> |                                                                                                                                                                                                                                                                                   |   |
| 1                                               | [[All "food selectivity"] OR [All picky]] AND [[All autism] OR [All autistic] OR [All asd] OR [All asperger] OR [All rett] OR [All disintegrative] OR [All pervasive]] within Canadian Journal of Occupational Therapy                                                            | 2 |
| 2                                               | [[All "food selectivity"] OR [All picky]] AND [[All autism] OR [All autistic] OR [All asd] OR [All asperger] OR [All rett] OR [All disintegrative] OR [All pervasive]] AND [All "occupational therapy"] within Canadian Journal of Occupational Therapy                           | 1 |
| <b>British Journal of Occupational Therapy</b>  |                                                                                                                                                                                                                                                                                   |   |
| 1                                               | [[All "food selectivity"] OR [All picky]] AND [[All autism] OR [All autistic] OR [All asd] OR [All asperger] OR [All rett] OR [All disintegrative] OR [All pervasive]] within British journal of occupational therapy                                                             | 4 |
| 2                                               | [[All "food selectivity"] OR [All picky]] AND [[All autism] OR [All autistic] OR [All asd] OR [All asperger] OR [All rett] OR [All disintegrative] OR [All pervasive]] AND [All "occupational therapy"] within British journal of occupational therapy                            | 4 |

**Journal of  
Occupational  
Therapy**

- |   |                                                                                                                                                                                                          |   |
|---|----------------------------------------------------------------------------------------------------------------------------------------------------------------------------------------------------------|---|
| 1 | "("food selectivity" OR picky) AND (autism OR autistic OR ASD OR asperger OR rett OR disintegrative OR pervasive)" anywhere published in "Occupational Therapy International"                            | 1 |
| 2 | "("food selectivity" OR picky) AND (autism OR autistic OR ASD OR asperger OR rett OR disintegrative OR pervasive) AND "occupational therapy"" anywhere published in "Occupational Therapy International" | 1 |

**Hong Kong Journal  
of Occupational  
Therapy**

- |   |                                                                                                                                                                                                                                                          |   |
|---|----------------------------------------------------------------------------------------------------------------------------------------------------------------------------------------------------------------------------------------------------------|---|
| 1 | [[All "food selectivity"] OR [All picky]] AND [[All autism] OR [All autistic] OR [All asd] OR [All asperger] OR [All rett] OR [All disintegrative] OR [All pervasive]] within Hong kong Journal of Occupational therapy                                  | 1 |
| 2 | [[All "food selectivity"] OR [All picky]] AND [[All autism] OR [All autistic] OR [All asd] OR [All asperger] OR [All rett] OR [All disintegrative] OR [All pervasive]] AND [All "occupational therapy"] within Hong kong Journal of Occupational therapy | 1 |
-
